# Supplementary material
Source: ML conference proceedings conference paper supplement (https://openreview.net/forum?id=4Sn2vUs0zA)
Supplement: supplementary_material [file attachment]

## 8 Supplementary Material

### 8.1 Background on Linearly Solvable MDP

Since the Reference-Based POMDP expands the Linearly Solvable (fully observed) MDPs [18, 19, 20] to POMDPs, for completeness, here, we summarise Linearly Solvable MDPs.

A standard infinite horizon MDP is specified by tuple  $\langle \mathcal{S}, \mathcal{A}, \mathcal{T}, R, \gamma \rangle$ , where  $\mathcal{S}$  and  $\mathcal{A}$  are the state and action spaces,  $\mathcal{T}(s, a, s')$  is the conditional probability function  $P(s' | s, a)$  that specifies the probability the agent arrives at state  $s' \in \mathcal{S}$  after performing action  $a \in \mathcal{A}$  at state  $s \in \mathcal{S}$ ,  $R$  is the reward function, and  $\gamma \in (0, 1)$  is the discount factor. The solution to an MDP problem is an optimal policy  $\pi^* : \mathcal{S} \rightarrow \mathcal{A}$  that maximises the value function:

$$V^*(s) = \max_{a \in \mathcal{A}} \left[ R(s, a) + \gamma \sum_{s' \in \mathcal{S}} \mathcal{T}(s, a, s') V^*(s') \right] \quad (30)$$

The works in [18, 19, 20] consider a class of MDPs where, the state space  $\mathcal{S}$  is finite and for any states  $s, s' \in \mathcal{S}$ , there exists a one-step (not necessarily time-homogeneous) transition probability  $p(s' | s)$  representing the *passive dynamics* of the system. They propose a new formulation of MDPs, called Linearly Solvable MDPs, to be specified by  $\langle \mathcal{S}, p, r, \gamma \rangle$ , where  $r : \mathcal{S} \rightarrow \mathbb{R}$  is the reward function. A solution to the Linearly Solvable MDP is a stochastic state-to-state transition probability  $u(\cdot | s)$  that maximises:

$$v(s) = \sup_{u(\cdot | s) \in \mathcal{U}_p(s)} \left( r(s) - \text{KL}(u(\cdot | s) \| p(\cdot | s)) + \gamma \sum_{s' \in \mathcal{S}} u(s' | s) v(s') \right). \quad (31)$$

where  $\mathcal{U}_p(s)$  is the set of admissible controls. An admissible control  $u(\cdot | s)$  is one that prohibits state transitions that are not feasible under the passive dynamics  $p(\cdot | s)$ .

Now, suppose  $w(s) := e^{v(s)}$  for any  $s \in \mathcal{S}$ , then (31) is equivalent to

$$w(s) = e^{r(s)} \sum_{s' \in \mathcal{S}} p(s' | s) w^\gamma(s'). \quad (32)$$

Moreover, the solution  $w^*$  to the above equation exists and is unique. The optimal stochastic transition to the equation (31) is given by

$$u^*(\cdot | s) = \frac{p(\cdot | s) w^{*\gamma}(\cdot)}{D[w^{*\gamma}](s)}. \quad (33)$$

where  $D[w^{*\gamma}](s) := \sum_{s' \in \mathcal{S}} p(s' | s) w^{*\gamma}(s')$  is a normaliser. Intuitively, one can view  $w^*$  as the desirability score, so that (33) represents distorting the passive dynamics to transition dynamics that favour transitioning to states with higher desirability scores. Of course,  $w^*$  is not known a priori but it can be determined by iterating the Bellman backup operator given by (32). This computation essentially reduces to taking expectations under the reference dynamics, which can be computed faster than searching for the optimal value function in (30) directly.

A standard MDP can be *embedded* in a linearly solvable MDP. This implies that, for a given standard MDP problem  $\langle \mathcal{S}, \mathcal{A}, \mathcal{T}, R, \gamma \rangle$ , one can embed it as an instance of a linearly solvable MDP, use the above efficient machinery to determine the solution to the linearly solvable MDP  $u^*(\cdot | s)$ , and then choose the symbolic action  $a^* \in \mathcal{A}$  such that  $\mathcal{T}(s' | s, a^*)$  is as close as possible to  $u^*(\cdot | s)$ . Empirical results in [19] indicate that there is a close correspondence between the optimal value of the embedded standard MDP  $\langle \mathcal{S}, \mathcal{A}, \mathcal{T}, R, \gamma \rangle$  and the optimal value of the linearly solvable MDP.

### 8.2 Proof of Lemma 3.1

*Step 1.* We first need to verify that a maximiser to the supremum in (10) exists. To this end, define  $\mathcal{W}(b) := e^{\mathcal{V}(b)}$  for any  $b \in \mathcal{B}$  and notice that the terms inside the supremum in the RHS of equation

412 (10) can be rewritten as

$$\begin{aligned}
& \sum_{a,o} \mathbb{U}(a, o | b) \left[ \mathcal{R}(b, a) - \log \left\{ \frac{\mathbb{U}(a, o | b)}{\mathbb{U}^{\mathbb{P}}(a, o | b)} \right\} \right. \\
& \quad \left. + \gamma \sum_{a,o} \mathcal{V}(\tau(b, a, o)) \right] \\
&= - \sum_{a,o} \mathbb{U}(a, o | b) \left[ \log \left\{ \frac{\mathbb{U}(a, o | b)}{\mathbb{U}^{\mathbb{P}}(a, o | b) e^{\mathcal{R}(b,a)} \mathcal{W}^{\gamma}(\tau(b, a, o))} \right\} \right] \\
&= - \sum_{a,o} \mathbb{U}(a, o | b) \left[ \log \left\{ \frac{\mathbb{U}(a, o | b) \mathcal{D}[\mathcal{W}^{\gamma}](b)}{\mathbb{U}^{\mathbb{P}}(a, o | b) e^{\mathcal{R}(b,a)} \mathcal{W}^{\gamma}(\tau(b, a, o))} \right\} \right. \\
& \quad \left. - \log \{ \mathcal{D}[\mathcal{W}^{\gamma}](b) \} \right] \\
&= - \text{KL} \left( \mathbb{U}(\cdot, \cdot | b) \parallel \frac{\mathbb{U}^{\mathbb{P}}(\cdot, \cdot | b) e^{\mathcal{R}(b,a)} \mathcal{W}^{\gamma}(\tau(b, a, o))}{\mathcal{D}[\mathcal{W}^{\gamma}](b)} \right) \\
& \quad + \log \{ \mathcal{D}[\mathcal{W}^{\gamma}](b) \} \quad (34)
\end{aligned}$$

413 where  $\mathcal{D}[\mathcal{W}^{\gamma}](b) := \sum_{a,o} \mathbb{U}^{\mathbb{P}}(a, o | b) e^{\mathcal{R}(b,a)} \mathcal{W}^{\gamma}(\tau(b, a, o))$  is a normalising factor. Only the KL  
414 divergence term in the last line above depends on  $\mathbb{U}$ . We know that the KL divergence is minimised  
415 when its two component distributions are identical. That is, when

$$\mathbb{U}^*(a, o | b) = \frac{\mathbb{U}^{\mathbb{P}}(a, o | b) e^{\mathcal{R}(b,a)} \mathcal{W}^{\gamma}(\tau(b, a, o))}{\mathcal{G}(b)}. \quad (35)$$

416 It is clear that  $\mathbb{U}^*$  belongs to the space  $\mathcal{Z}_{\mathbb{P}}(b)$  since  $\mathbb{U}^{\mathbb{P}}(a, o | b) = 0$  implies that  $\mathbb{U}^*(a, o | b) = 0$  too.  
417 Therefore, we conclude that the supremum is attained and that  $\mathbb{U}^*$  is the maximiser.

418 *Step 2.* Now, we can essentially repeat the classical argument from Ross [15] (see e.g. Theorem 6.5).  
419 Namely, let  $\Phi : \mathbb{B}(\mathcal{B}) \rightarrow \mathbb{B}(\mathcal{B})$  be the Bellman backup operator

$$\begin{aligned}
\Phi \mathcal{V}(b) := & \sup_{\mathbb{U} \in \mathcal{Z}_{\mathbb{P}}(b)} \left( \mathcal{R}(b, \mathbb{U}) - \text{KL}(\mathbb{U} \parallel \mathbb{U}^{\mathbb{P}}) \right. \\
& \left. + \gamma \mathbb{E}_{\mathbb{U}}[\mathcal{V}(\tau, \cdot, \cdot)] \right) \quad \forall b \in \mathcal{B} \quad (36)
\end{aligned}$$

420 where, for brevity, we write

$$\text{KL}(\mathbb{U} \parallel \mathbb{U}^{\mathbb{P}}) := \text{KL}(\mathbb{U}(\cdot, \cdot | b) \parallel \mathbb{U}^{\mathbb{P}}(\cdot, \cdot | b)) \quad (37)$$

421 and

$$\mathbb{E}_{\mathbb{U}}[\mathcal{V}(\tau, \cdot, \cdot)] := \sum_{a,o} \mathbb{U}(a, o | b) \mathcal{V}(\tau(b, a, o)). \quad (38)$$

422 We want to show that  $\Phi$  is a contraction. For any  $b \in \mathcal{B}$  and any  $\mathcal{V}_1, \mathcal{V}_2 \in \mathbb{B}(\mathcal{B})$ ,

$$\begin{aligned}
& (\Phi \mathcal{V}_1)(b) - (\Phi \mathcal{V}_2)(b) \\
&= \sup_{\mathbb{U} \in \mathcal{Z}_{\mathbb{P}}(b)} \left( \mathcal{R}(b, \mathbb{U}) - \text{KL}(\mathbb{U} \parallel \mathbb{U}^{\mathbb{P}}) + \gamma \mathbb{E}_{\mathbb{U}}[\mathcal{V}_1(\tau, \cdot, \cdot)] \right) \\
& \quad - \sup_{\tilde{\mathbb{U}} \in \mathcal{Z}_{\mathbb{P}}(b)} \left( \mathcal{R}(b, \tilde{\mathbb{U}}) - \text{KL}(\tilde{\mathbb{U}} \parallel \mathbb{U}^{\mathbb{P}}) + \gamma \mathbb{E}_{\tilde{\mathbb{U}}}[\mathcal{V}_2(\tau, \cdot, \cdot)] \right) \\
&\leq \left( \mathcal{R}(b, \mathbb{U}^*) - \text{KL}(\mathbb{U}^* \parallel \mathbb{U}^{\mathbb{P}}) + \gamma \mathbb{E}_{\mathbb{U}^*}[\mathcal{V}_1(\tau, \cdot, \cdot)] \right) \\
& \quad - \left( \mathcal{R}(b, \mathbb{U}^*) - \text{KL}(\mathbb{U}^* \parallel \mathbb{U}^{\mathbb{P}}) + \gamma \mathbb{E}_{\mathbb{U}^*}[\mathcal{V}_2(\tau, \cdot, \cdot)] \right) \\
&= \gamma \sum_{a,o} \mathbb{U}^*(a, o | b) \left[ \mathcal{V}_1(\tau(b, a, o)) - \mathcal{V}_2(\tau(b, a, o)) \right] \\
& \leq \gamma \|\mathcal{V}_1 - \mathcal{V}_2\|_{\infty} \quad (39)
\end{aligned}$$

where  $\mathbb{U}^*$  is the maximiser of

$$\mathcal{R}(b, \mathbb{U}) - \text{KL}(\mathbb{U} \parallel \mathbb{U}^p) + \gamma \mathbb{E}_{\mathbb{U}}[\mathcal{V}_1(\tau, \cdot, \cdot)]. \quad (40)$$

Reversing the roles of  $\mathcal{V}_1$  and  $\mathcal{V}_2$  and using the fact that  $b \in \mathcal{B}$  is arbitrary, we conclude that

$$\|\Phi \mathcal{V}_1 - \Phi \mathcal{V}_2\|_{\infty} \leq \gamma \|\mathcal{V}_1 - \mathcal{V}_2\|_{\infty}. \quad (41)$$

Since we assumed that  $\gamma \in (0, 1)$ , we conclude that  $\Phi$  is a contraction.

### 8.3 Proof of Theorem 3.1

Repeating the argument in Step 1 of 8.2, we see that the Bellman equation (10) reduces to

$$\begin{aligned} \mathcal{V}(b) &= \log [\mathcal{D}[w^{\gamma}](b)] \\ &= \log \left[ \sum_{a,o} \mathbb{U}^p(a, o | b) e^{\mathcal{R}(b,a)} \mathcal{W}^{\gamma}(\tau(b, a, o)) \right] \end{aligned} \quad (42)$$

which, after taking exponents, justifies the equivalence to (12). Given this equivalence and Lemma 3.1, it is clear that (12) has a unique solution. To be more explicit, suppose for a contradiction that (12) does not have exactly one solution (up to  $\|\cdot\|$ -equivalence of solutions). Then by the equivalence between the two Bellman equations, (10) would either have no solutions or more than one solution which contradicts the existence and uniqueness guaranteed by Lemma 3.1. Finally, (13) follows from the form of the maximiser at each Bellman step.

### 8.4 Proof of Proposition 3.1

For brevity, we will fix a  $b \in \mathcal{B}$  and drop it from our notation. Also write  $u = u(\cdot | b)$  and  $u_a = u(a | b)$ . The Lagrangian for the constrained problem is

$$\begin{aligned} \mathcal{L}(u, \lambda) &= \sum_{a,o} P(o | a) u_a \log \left[ \frac{P(o | a) u_a}{\mathbb{U}^*(a, o)} \right] \\ &\quad + \lambda \left( \sum_a u_a - 1 \right). \end{aligned} \quad (43)$$

We require, in addition, that the minimiser  $u^*$  (which exists due to the Weierstrass extreme value theorem) is such that  $u_a^* \geq 0$  for each  $a \in \mathcal{A}$ . The first order necessary conditions gives

$$u_a = e^{-(1+\lambda)} \exp[-\Pi(a)] \quad \forall a \in \mathcal{A} \quad (44)$$

and the constraint equation gives

$$1 = \sum_a u_a = e^{-(1+\lambda)} \sum_a \exp[-\Pi(a)]. \quad (45)$$

Hence the only candidate for the minimiser is  $u^*$  such that

$$u_a^* = \frac{\exp[-\Pi(a)]}{\sum_{\hat{a} \in \mathcal{A}} \exp[-\Pi(\hat{a})]} \quad \forall a \in \mathcal{A}. \quad (46)$$

The Hessian of  $\mathcal{L}$  is positive definite for any  $\lambda$  and  $u \in \Delta(\mathcal{A})$ , so we conclude that  $u^*$  is a minimiser. Finally, that  $u_a^* \geq 0$  for every  $a \in \mathcal{A}$  is clear from (46).

### 8.5 Proof of Proposition 4.1

*Proof.* Fix an  $\hat{a} \in \mathcal{A}$  and  $b \in \mathcal{B}$ . Clearly  $\mathbf{p}$  as defined in (24) has full support on  $\mathcal{A}$ . Thus, if we set

$$u^{\hat{a}}(a | b) := \begin{cases} 1, & a = \hat{a} \\ 0, & \text{otherwise} \end{cases} \quad (47)$$

and

$$\mathbb{U}^{\hat{a}}(a, o | b) := P(o | \hat{a}, b) u^{\hat{a}}(a | b) \in \mathcal{U}_{\mathbf{p}} \quad (48)$$

for any  $u^{\hat{a}} \in \Delta(\mathcal{A})$  then the constraint (21) is satisfied trivially. Straightforward computations show that the constraint (22) is satisfied by  $\mathbb{U}^{\hat{a}}(a, o | b)$  with  $(\rho, \mathbf{p})$  as defined in (23) and (24).  $\square$

## 448 8.6 Proof of Proposition 4.2

449 *Proof.* For a fixed  $\delta > 0$ , the matrix equation (25) has a solution  $\mathbf{x}_\delta$  if and only if

$$\sum_{s \in \mathcal{S}} b(s) \rho_\delta(s) = \ell(b) \quad \forall b \in C_\delta. \quad (49)$$

450 As  $\delta \downarrow 0$  the  $\delta$ -cover converges to the set  $\mathcal{R}$  which proves that the pair  $(\rho, \mathbf{p})$  is an embedding.  $\square$

## 451 8.7 Algorithm REFSOLVER

---

### Algorithm 1 REFSOLVER

---

```

parameters:
   $\langle \mathcal{S}, \mathcal{A}, \mathcal{T}, \mathcal{R}, \gamma \rangle$ 
  max-depth
  max-rollout-depth
   $\alpha \triangleright \text{expl const} = 1 - \alpha$ 
require:  $\gamma \in (0, 1), \alpha \in [0, 1]$ 



---


PRE-PROCESS (OFFLINE)
1:  $\pi^{\text{FO}} \leftarrow \text{GENERATE-FO-POLICY}(\langle \mathcal{S}, \mathcal{A}, \mathcal{T}, \mathcal{R}, \gamma \rangle)$ 



---


2: RUNTIME (ONLINE)
3: procedure PLAN-AND-EXECUTE( $h$ )
4:   repeat
5:     if  $h = \emptyset$  then
6:        $s \sim \mathcal{I}$ 
7:     else
8:        $s \sim \mathcal{B}(h)$ 
9:     end if
10:    SIMULATE( $s, h, 0$ )
11:    until TIMEOUT()
12:    return OPTIMAL-STOCHASTIC-POLICY( $h$ )
13: end procedure

14: procedure ROLLOUT( $s, h, \text{depth}$ )
15:    $a \leftarrow \pi^{\text{FO}}(s)$ 
16:   if  $s \in \mathcal{G}$  or  $\text{depth} > \text{max-rollout-depth}$  then
17:     return  $\mathcal{R}(s, a)$ 
18:   end if
19:    $(s', o, \mathcal{R}) \sim \mathcal{G}(s, a) \triangleright \text{generative model}$ 
20:   return  $\mathcal{R}(s, a) + \text{ROLLOUT}(s', hao, \text{depth} + 1)$ 
21: end procedure

22: procedure SIMULATE( $s, h, \text{depth}$ )
23:   if  $s \in \mathcal{G}$  or  $\text{depth} > \text{max-depth}$  then
24:     return  $\exp(\text{ROLLOUT}(s, h, \text{max-depth}))$ 
25:   end if
26:    $\mathcal{B}(h) \leftarrow \mathcal{B}(h) \cup \{s\}$ 
27:    $N(h) \leftarrow N(h) + 1$ 
28:    $X \sim \text{Bernoulli}(\alpha)$ 
29:    $a \leftarrow \pi^{\text{FO}}(s) I_{\{X=1\}} + (1 - \alpha) \times I_{\{X=0\}}$ 
30:    $(s', o, \mathcal{R}) \sim \mathcal{G}(s, a)$ 
31:    $N(ha) \leftarrow N(ha) + 1$ 
32:    $\hat{\mathcal{R}}(ha) \leftarrow \hat{\mathcal{R}}(ha) + \frac{\mathcal{R}(s, a) - \hat{\mathcal{R}}(ha)}{N(ha)}$ 
33:    $\hat{\mathcal{W}} \leftarrow \hat{\mathcal{W}} + \frac{e^{\hat{\mathcal{R}}(ha)} \text{SIMULATE}(s', hao, \text{depth} + 1) - \hat{\mathcal{W}}(h)}{N(h)}$ 
34:   return  $\hat{\mathcal{W}}(h)^\gamma$ 
35: end procedure

36: procedure OPTIMAL-STOCHASTIC-POLICY( $h$ )
37:    $\mathcal{D} \leftarrow 0 \triangleright \text{Normaliser}$ 
38:   for  $a \in \mathcal{A}$  and  $o \in \mathcal{O}$  do
39:     if  $hao \notin \mathcal{T}$  then
40:        $\hat{\mathcal{U}}^*(hao) = 0$ 
41:     else
42:        $\hat{\mathcal{U}}^*(hao) \leftarrow \frac{N(hao)}{N(h)} e^{\hat{\mathcal{R}}(hao)} \mathcal{W}^\gamma(hao)$ 
43:     end if
44:      $\mathcal{D} \leftarrow \mathcal{D} + \hat{\mathcal{U}}^*(hao)$ 
45:   end for
46:   for  $a \in \mathcal{A}$  do
47:      $\Pi(a) \leftarrow \frac{N(hao)}{N(ha)} \log \left[ \frac{N(hao) \mathcal{D}}{N(ha) \hat{\mathcal{U}}^*(hao)} \right]$ 
48:   end for
49:    $\mathbf{u}^* \leftarrow \{a : \exp[-\Pi(a)] / \mathcal{D}^\Pi\}$ 
50:   return RANDOM-SAMPLE( $\mathbf{u}^*$ )
51: end procedure

```

---

## 452 8.8 Details of Navigation1 Scenario

453 The robot can move in the four cardinal directions with 0.1 probability of actuator failure. If the  
 454 realised movement leads to a collision with an obstacle or the edge of the map, no movement occurs  
 455 and the robot remains in its current position. If the robot's true state is a landmark, the robot receives  
 456 a position reading uniformly in the  $9 \times 9$  grid around the robot's true state. Outside the landmarks,  
 457 the robot receives no observation. The robot receives a penalty of -100 for entering a danger zone

458 and a reward of +300 for entering a goal state. In both cases, the problem terminates. Every other  
459 state incurs a reward of -1. The discount parameter was 0.99. The robot's initial belief was equally  
460 distributed between two initial positions that were uniformly sampled from the southern-most row of  
461 the map.

## 462 **8.9 Details of Navigation2 Scenario**

463 Similar to Navigation1, the robot's action space consists of moves anywhere in the four cardinal  
464 directions NORTH, SOUTH, EAST, WEST. To simulate noise in the robot's actuator's, actions fail  
465 with 0.1 probability, and if this occurs, the robot moves randomly in a direction orthogonal to the  
466 one specified. If the realised movement leads to a collision with an obstacle or the edge of the  
467 map, no movement occurs and the robot remains in its current position. If the robot's true state is a  
468 landmark, the robot receives a position reading uniformly in the  $9 \times 9$  grid around the robot's true  
469 state. Otherwise, the robot receives no observation. The robot receives a reward of +600 for being in  
470 a goal state, and -3 for being in any other state. The discount parameter was  $\gamma = 0.99$ . The robot's  
471 initial belief was equally distributed between two initial positions that were uniformly sampled from  
472 the southern-most row of the map.

## 473 **8.10 Source code**

474 We also include the source codes for REFSOLVER, which is developed on top of pomdp\_py.
